# Supplementary material for: A new thermoresponsive polymer of poly(N-acryloylsarcosine methyl ester) with a tunable LCST
Source: Royal Society of Chemistry journal article supplement (doi:10.1039/c7py00274b), 2017-01-01
Supplement: c7py00274b1.pdf [file c7py00274b1.pdf]

## Supporting information for

### A new thermoresponsive polymer of poly(*N*-acryloylsarcosine methyl ester) with tunable LCST

Shengli Chen,<sup>†</sup> Ke Wang,<sup>†</sup> and Wangqing Zhang<sup>\*,†,‡</sup>

<sup>†</sup>Key Laboratory of Functional Polymer Materials of the Ministry of Education, Institute of Polymer Chemistry, College of Chemistry, Nankai University, Tianjin 300071, China.

<sup>‡</sup>Collaborative Innovation Center of Chemical Science and Engineering (Tianjin), Nankai University, Tianjin 300071, China.

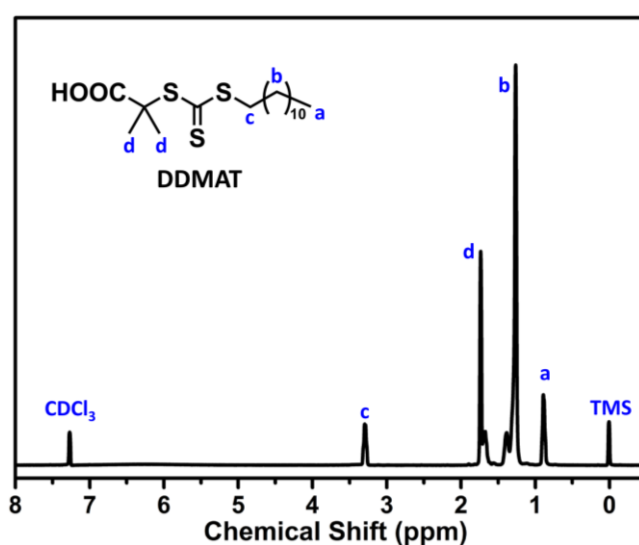

Figure S1. <sup>1</sup>H NMR spectra of DDMAT dissolved in CDCl<sub>3</sub>.

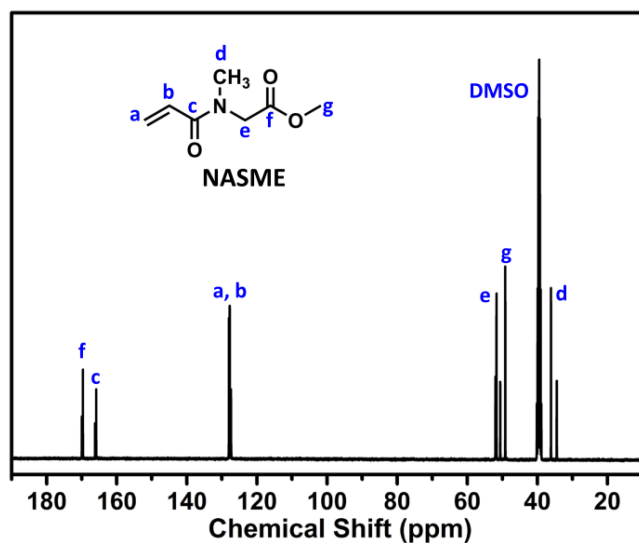

Figure S2. <sup>13</sup>C NMR spectra of the NASME monomer dissolved in DMSO.

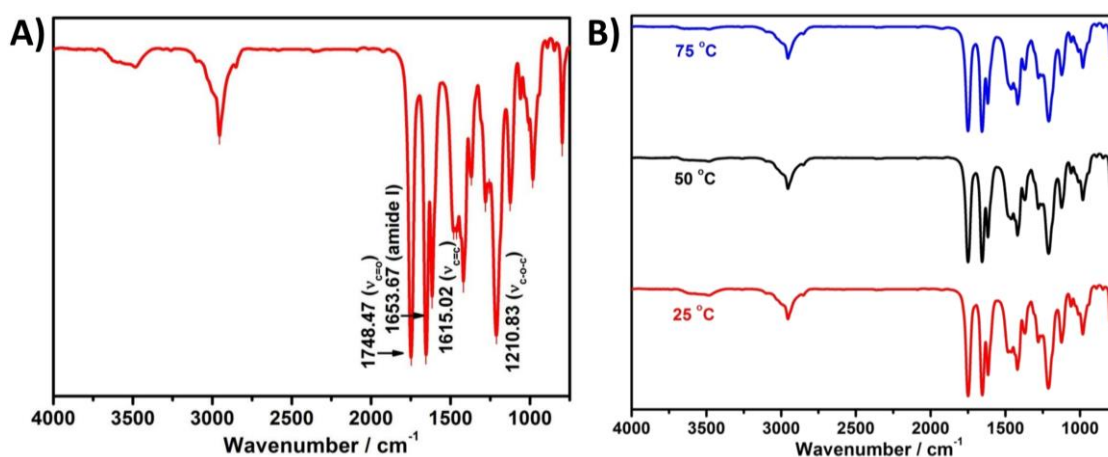

**Figure S3.** FTIR spectra of the NASME monomer at room temperature (A) and at various temperatures of 25 °C, 50 °C , and 75 °C (B).

$$k_c = \frac{k_I}{k_{II}} = \frac{\Delta \nu}{2\delta_{\nu\tau}} \quad \text{(Equation S1)}$$

$$\Delta G = 19.14T_c \left( 10.62 + \log \frac{1+\Delta P}{1-\Delta P} + \log \frac{T_c}{k_c} \right) \quad \text{(Equation S2)}$$

Where  $k_c$  is the rate content,  $\Delta G$  is the free energy of activation (the energy barrier) for exchange process;  $\Delta \nu$  is the chemical shift difference (in Hz) of isomers, for NASME the value is given by 90 Hz;  $T_c$  is the coalescence temperature, for NASME the value is given by 343.15 K;  $\Delta P$  is the relative concentration difference of isomers, for NASME the value is given by 0.36;  $\delta_{\nu\tau}$  can be obtained according to the line-shape analysis showed in the literatures.<sup>1,2</sup>

$$M_{n,th} = \frac{[\text{monomer}]_0 \times M_{\text{monomer}}}{[\text{RAFT}]_0} \times \text{Conversion} + M_{n, \text{RAFT}/\text{macro-RAFT}} \quad \text{(Equation S3)}$$

where  $[\text{monomer}]_0$  and  $[\text{RAFT}]_0$  represent the concentration of the fed monomer and the RAFT agent, the Conversion is determined by <sup>1</sup>H NMR analysis by comparing the integral areas of the monomer protons of C=C-H at  $\delta = 5.60\text{-}5.80$  ppm with those of the 1,3,5-trioxane internal standard at  $\delta = 5.10\text{-}5.20$  ppm, and  $M_{\text{monomer}}$  and  $M_{n, \text{RAFT}/\text{macro-RAFT}}$  are the molar mass of the monomer and the RAFT/macro-RAFT agent, respectively.

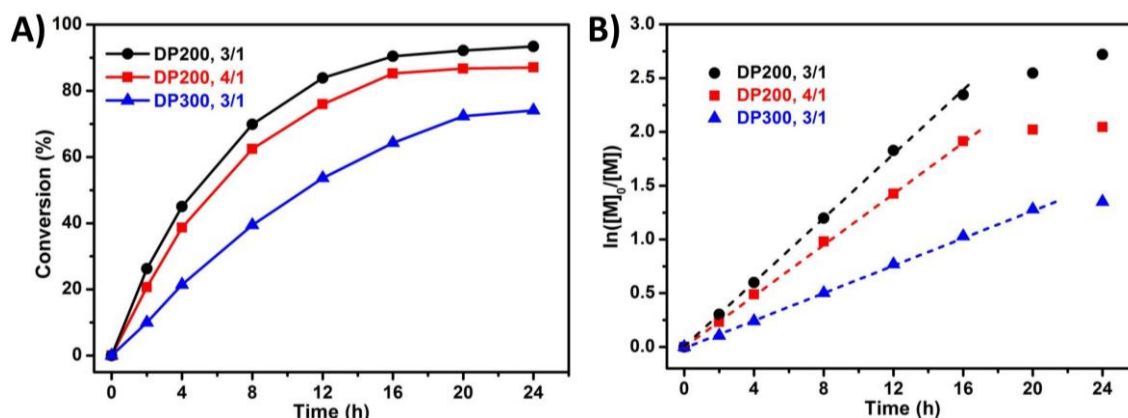

**Figure S4.** Three polymerization kinetics of solution RAFT polymerization of NAGME: the plots of time-dependent monomer conversion (A) and the  $\ln([M]_0/[M])$ -time plots of the RAFT polymerization (B). Conditions:  $[NASME]_0 = 4$  M, 1,4-dioxane, 70 °C. The lines are only meant to guide the eye. DP200,3/1, DP200,4/1 and DP300,3/1 represent the molar ratio of  $[NASME]_0:[DDMAT]_0:[AIBN]_0 = 600:3:1, 800:4:1; 900:3:1$ , respectively.

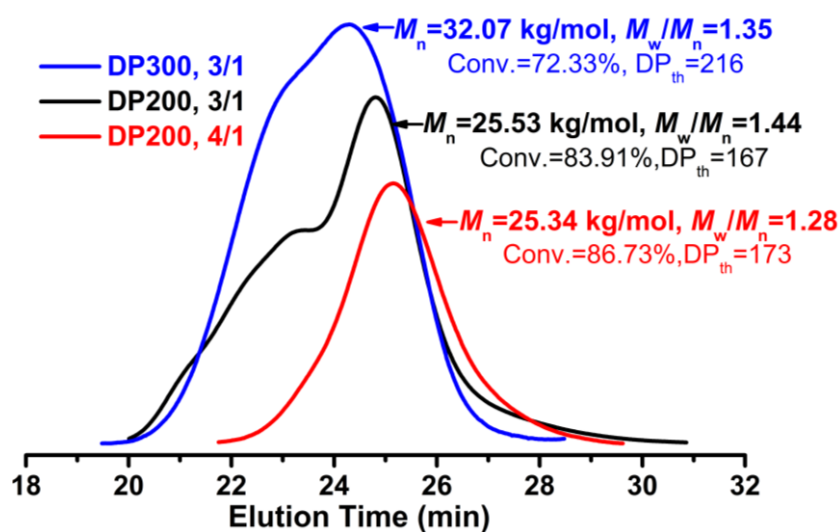

**Figure S5.** The GPC traces of PNASME at the maximum conversion under three different polymerization ratio. Note: the comments of the cures refer to Figure S3.

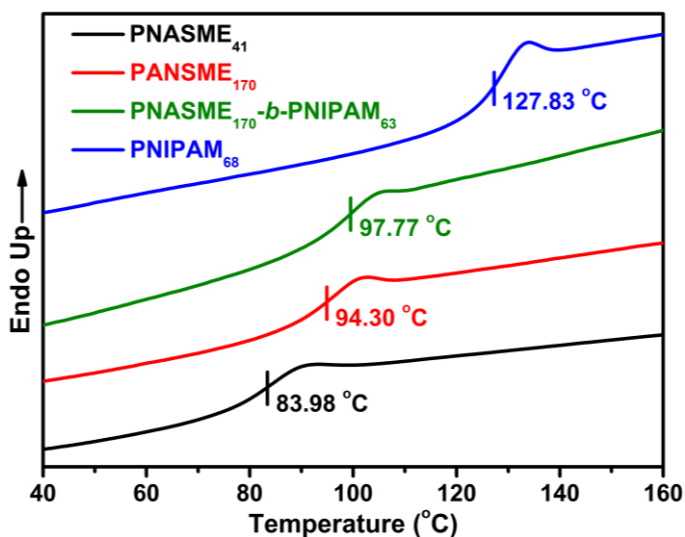

**Figure S6.** DSC thermograms of PNIPAM<sub>68</sub>, PNASME<sub>170</sub>-*b*-PNIPAM<sub>63</sub>, PNASME<sub>41</sub>, and PNASME<sub>170</sub>, in which the subscripts represent the DP of the corresponding monomers. All the polymer samples were heated from 25 to 180 °C at a heating/cooling rate of 10 °C min<sup>-1</sup> for three cycles, and the second heating cure was used to determinate the glass transition temperature ( $T_g$ ) at the middle of the step transition.

**Table S1.** Fitted values for  $c$ ,  $B_{\max}$  and  $K_d$  from the CP tests of PNASME for anions.

| Na <sup>+</sup> Counter anion               | $c$ (°C/mol) | $B_{\max}$ (°C) <sup>a</sup> | $K_d$ (M) <sup>a</sup> |
|---------------------------------------------|--------------|------------------------------|------------------------|
| SCN <sup>-</sup>                            | -317.45      | 10.81                        | 31.83                  |
| ClO <sub>4</sub> <sup>-</sup>               | -159.97      | 3.56                         | 20.02                  |
| I <sup>-</sup>                              | -78.08       | 1.78                         | 19.36                  |
| NO <sub>3</sub> <sup>-</sup>                | -8.35        | 0.0094                       | 0.46                   |
| Br <sup>-</sup>                             | -7.96        | 0.0088                       | 0.49                   |
| Cl <sup>-</sup>                             | -7.88        | 0                            | 0                      |
| F <sup>-</sup>                              | -16.79       | 0                            | 0                      |
| H <sub>2</sub> PO <sub>4</sub> <sup>-</sup> | -26.86       | 0                            | 0                      |
| S <sub>2</sub> O <sub>3</sub> <sup>2-</sup> | -34.89       | 0                            | 0                      |
| SO <sub>4</sub> <sup>2-</sup>               | -51.65       | 0                            | 0                      |

<sup>a</sup> The  $K_d$  values larger than 1 M<sup>-1</sup> represent binding weaker than those measured at the highest concentration of salt.

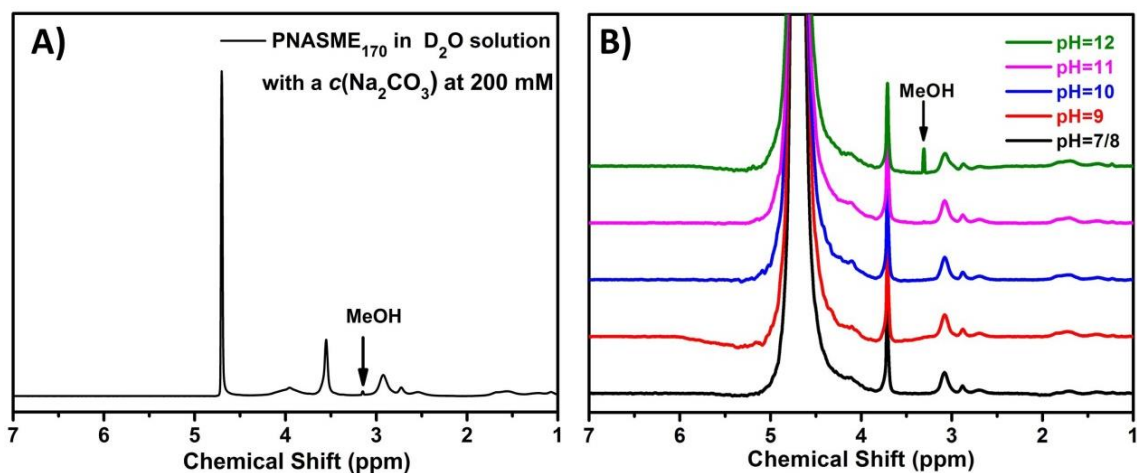

**Figure S7.** The  $^1\text{H}$  NMR spectra of PNASME<sub>170</sub> in D<sub>2</sub>O solution with a Na<sub>2</sub>CO<sub>3</sub> concentration at 200 mM (A) and the  $^1\text{H}$  NMR spectra of PNASME<sub>170</sub> in D<sub>2</sub>O solution at different pH values adjusted with NaOH (B).

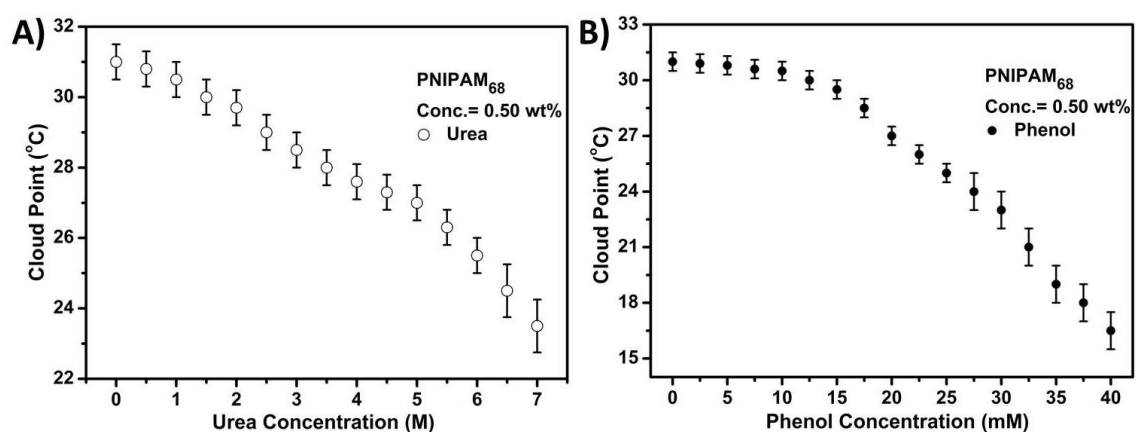

**Figure S8.** The CP PNIPAM<sub>68</sub> as a function of the concentration of urea (A) and phenol (B) with a polymer concentration of 0.50 wt%.

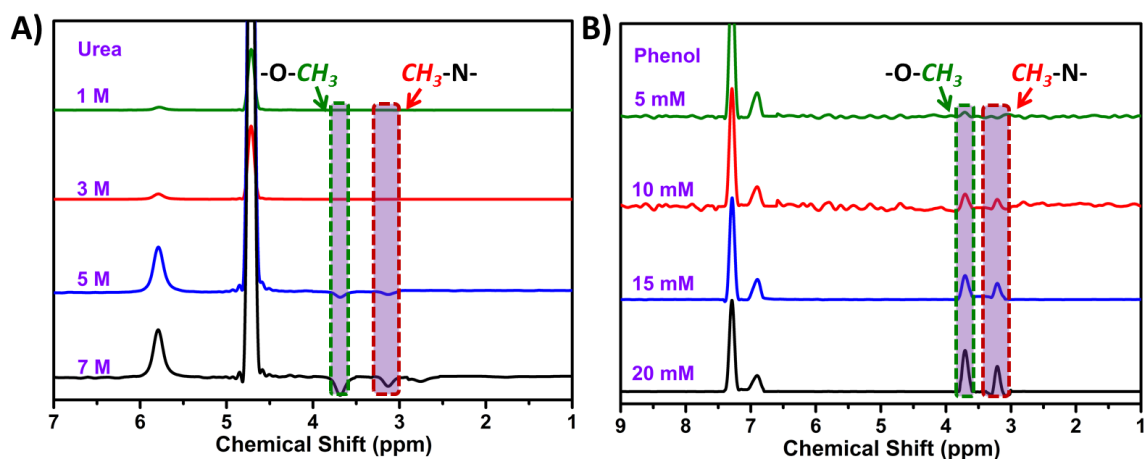

**Figure S9.** The pendants of PNASME<sub>170</sub> NOE correlated with urea (A) and phenol (B) at

different concentration. The negative column slices of urea are extracted from 5.77 ppm of urea protons, and the positive column slices of phenol are extracted from 7.28 ppm of phenyl protons. The peaks highlighted in gray indicate the cross-peaks of ester methyl (green dashed box) and amide methyl (red dashed box), respectively. The signals at 7.28 ppm and 6.90 ppm were assigned to the phenyl protons of phenol. Note: the urea-water cross peaks are barely detected at concentration lower than 3 M, because of the proton exchange between urea and D<sub>2</sub>O.

## References

- (1) Shanan-Atidi, H.; Bar-Eli, K. H. A convenient method for obtaining free energies of activation by the coalescence temperature of an unequal doublet. *J. Phys. Chem.* **1970**, *74*, 961-963.
- (2) Gutowsky, H. S.; Holm, C. H. Rate Processes and Nuclear Magnetic Resonance Spectra. II. Hindered Internal Rotation of Amides. *J. Chem. Phys.* **1956**, *25*, 1228-1234.
